# Supplementary material for: Specific recognition of an FGFR2 fusion by tumor infiltrating lymphocytes from a patient with metastatic cholangiocarcinoma
Source: PubMed Central journal article supplement — J Immunother Cancer. 2023 Apr 12;11(4):e006303. doi: 10.1136/jitc-2022-006303 (PMC10106037; doi:10.1136/jitc-2022-006303), 2023-04-12
Supplement: jitc-2022-006303supp008.pdf [file jitc-2022-006303supp008.pdf]

## Supplementary Material

### Title

Specific Recognition of an *FGFR2* Fusion by Tumor Infiltrating Lymphocytes from a Patient with Metastatic Cholangiocarcinoma

### Authors

Bradley S. White<sup>\*,†</sup>, Sivasish Sindiri<sup>\*,†</sup>, Victoria K. Hill<sup>\*</sup>, Billel Gasmi<sup>\*</sup>, Shirley K. Nah<sup>\*</sup>, Jared J. Gartner<sup>\*</sup>, Todd D. Prickett<sup>\*</sup>, Yong F. Li<sup>\*</sup>, Devikala Gurusamy<sup>\*</sup>, Paul D. Robbins<sup>\*</sup>, Steven A. Rosenberg<sup>\*</sup> and Vid Leko<sup>\*,‡</sup>

<sup>\*</sup>Surgery Branch, National Cancer Institute, National Institutes of Health, Bethesda, MD 20892;

<sup>‡</sup>Immune Deficiency Cellular Therapy Program, National Cancer Institute, National Institutes of Health, Bethesda, MD 20892

<sup>†</sup>These authors contributed equally to this work.

**Running title:** *FGFR2* Fusion-Reactive T Cells

**Corresponding authors:** Vid Leko, Immune Deficiency Cellular Therapy Program, National Cancer Institute, National Institutes of Health, Building 10-CRC, Room 3-3832, 10 Center Drive, Bethesda, MD, 20892; Email: vid.leko@nih.gov; Steven A. Rosenberg, Surgery Branch, National Cancer Institute, National Institutes of Health, Building 10-CRC, Room 3-3942, 10 Center Drive, Bethesda, MD, 20892; Email: sar@mail.nih.gov

**Supplementary Figure 1.** (A) The heatmap depicts discordant read pairs (i.e., read pairs that mapped to two different partner genes, each on the opposite side of the fusion breakpoint), as reported by each fusion caller (rows) for all the tumor samples from four *FGFR2* fusion-positive patients (columns). (B-D) Results of the automated electrophoresis (left panels) and Sanger sequencing (right panels) of the amplification products generated by RT-PCR using fusion-specific primers for patient 2 (B), 3 (C) and 4 (D). cDNA from patient 3 was used as a negative control for patient 2; cDNA from patient 2 was used for patient 3; cDNA from patient 1 was used as negative control for patient 4. NT, no template. (E) Expression levels of each *FGFR2* fusion in individual tumors from patients 1-4. Each dot in the left panel represents a separate tumor; tumors from patients 2-4 were clustered together in the right panel for the purpose of statistical analysis (unpaired t-test;  $p < 0.0001$ ). RPKM, read base per kilobase per million.

**Supplementary Figure 2.** (A) Schematic representation of chromosome 10. Coordinates corresponding to transcript breakpoint regions for each fusion partner from four patients are indicated, as is their orientation and the distance from the transcript breakpoint of *FGFR2*. (B) Schematic representation of genes encoding the *FGFR2* fusions, as well as the wild type *FGFR2* and the individual partner proteins. Exon composition of each wild type gene was imported from the NCBI Reference Sequence Database (RefSeq). Because the fusion reconstruction was performed based on whole transcriptome and not whole genome sequencing, it was not possible to distinguish whether the fusion breakpoints occurred at the exon/intron boundaries or within the neighboring introns of each participating gene. Note that exons 1 from both *TDRD1* and *CEP55* refer to 5' untranslated regions (UTR) of the corresponding genes, and do not contribute to canonical protein translation (which starts from ATG in exon 2). To display the read coverage for each exon, RNA sequencing data from representative tumors was aligned to the reference genome hg38 using the STAR aligner.

**Supplementary Figure 3.** Mutational landscape in *FGFR2* fusion-positive and negative ICC cases. Statistical analysis was performed using the unpaired t-test. (A) Comparison of the total mutation number ( $p = 0.609$ ). (B) Comparison of the number of immunogenic mutations, as determined by previous TIL screening ( $p = 0.535$ ).

**Supplementary Figure 4.** (A) Representative sections of tumor C resected from patient 1, stained for surface MHC class I (upper panel) or class II molecules (lower panel). The staining patterns were consistent among all three tumors resected from patient 1. (B) Transcript expression levels (in transcripts per million, TPM) for all class I and II molecules detected in three tumors from patient 1.

**Supplementary Figure 5.** (A) Flow cytometric analysis of 4-1BB expression on CD8<sup>+</sup> TILs from the same experiment depicted in Figure 2B. (B) Results of multicytokine analysis on the supernatants from the experiment depicted in Figure 2C.

**Supplementary Figure 6. TIL from patients 2, 3 and 4 did not recognize any of the patient-specific *FGFR2* fusions.** (A) TILs from patient 2 (A), 3 (B) and 4 (C) were co-cultured with autologous DCs that were either pulsed with patient-specific *FGFR2* fusion 26-mer peptides or were transfected by the corresponding minigenes. The following day, IFN- $\gamma$  production was measured using IFN- $\gamma$  ELISPOT (upper panels), while the 4-1BB expression on CD8<sup>+</sup> T cells (middle panels) and CD4<sup>+</sup> T cells (lower panels) was assessed using flow cytometry. A tandem minigene (TMG) encoding point mutations from another patient (Irrel. TMG) and DMSO were used as negative controls for minigene and peptide testing, respectively. 25-mer peptides or TMGs encoding point mutations previously identified as neoantigens in TIL screens from the same patients (see Supplementary Table 2) were used as positive controls. PMA/ionomycin (PMA) was used as a non-specific positive control.

**Supplementary Figure 7.** (A) Transduction efficiencies for TCR1, as assessed by flow cytometry for mouse TCR-beta constant chain (mTCR- $\beta$ ) expression. Histograms depict mTCR- $\beta$  staining on untransduced (shaded) and transduced (unshaded) cells from two healthy donors; numbers indicate the percentage of transduced cells. Graphs were gated on live CD3<sup>+</sup> lymphocytes. (B) All peptides that spanned the *FGFR2*-TDRD1 breakpoint (each represented with a single dot) and that were predicted to bind to any of the paired MHC-II molecules from patient 1' tumor using NetMHCIIpan-4.0 were ranked by their affinity (with highest affinity-binders on the top). The strongest binder to HLA-DRB1\*04:04 that overlapped with the experimentally determined *FGFR2*-TDRD1 minimal epitope is indicated with an arrow. (C)

Flow cytometric analysis of HLA-DR expression on the surface of COS7 cells following co-transfection with plasmids encoding HLA-DRA1\*01:01 and HLA-DRB1\*04:04. (D) Automated electrophoresis for the FGFR2-TDRD1 amplification product from the cDNA of COS7 cells that were mock-transfected (“Mock”) or were transfected with an expression plasmid encoding the fusion construct (“Fusion”). NT, no template. Primers for the wild type African green monkey *GAPDH* were used to generate a positive control.

Supplementary Table 1. Patient and tumor characteristics

| Pt ID | Age / Sex | FGFR2 Fusion Identified | Initial AJCC Stage | Differentiation Status | Prior Therapies                                                                            | Sites of Metastatic Disease at Presentation to the NIH | TIL Harvest Location | Outcome After ACT |
|-------|-----------|-------------------------|--------------------|------------------------|--------------------------------------------------------------------------------------------|--------------------------------------------------------|----------------------|-------------------|
| 1     | 48/F      | FGFR2-TDRD1             | IIB                | Well                   | Gemcitabine+cisplatin, SBRT, infgratinib                                                   | Lung                                                   | Lung                 | N.T.              |
| 2     | 53/F      | FGFR2-CEP55             | IB                 | Moderate               | Cisplatin+gemcitabine, gemcitabine, docetaxel                                              | Lung, liver                                            | Lung                 | PR                |
| 3     | 58/F      | FGFR2-WAC               | II                 | Moderate               | Gemcitabine, futibatinib                                                                   | Lung, liver, adrenal, LN                               | Lung                 | PD                |
| 4     | 51/F      | FGFR2-WAC               | IB                 | Moderate               | Gemcitabine+oxaliplatin, HAI-Floxuridine, gemcitabine                                      | Lung                                                   | Lung                 | PD                |
| 5     | 47/F      | None                    | IV                 | Unknown                | Gemcitabine+carboplatin                                                                    | Lung, liver, bone                                      | Liver                | N.T.              |
| 6     | 47/F      | None                    | IIIB               | Moderate               | Hyperthermic 5-fluorouracil+gemcitabine, gemcitabine+cisplatin,                            | Lung, liver                                            | Liver                | N.T.              |
| 7     | 60/M      | None                    | IIIB               | Moderate to poor       | Gemcitabine+cisplatin x2, FOLFIRI, FOLFOX, gemcitabine                                     | Liver, peritoneum, LN                                  | Peritoneal           | PD                |
| 8     | 45/F      | None                    | IV                 | Moderate to poor       | Gemcitabine+capecitabine, gemcitabine+carboplatin, capecitabine, nab-paclitaxel, dasatinib | Lung, LN                                               | Lung                 | N.T.              |
| 9     | 49/M      | None                    | IV                 | Moderate               | Gemcitabine+cisplatin, cisplatin, IDH305 (IDH1 inhibitor), ivosidenib                      | Lung, liver, bone                                      | Liver                | N.T.              |
| 10    | 44/M      | None                    | IV                 | Poor                   | TACEx3, gemcitabine+cisplatin                                                              | Lung, liver, LN                                        | Lung                 | N.T.              |
| 11    | 67/F      | None                    | IV                 | Poor                   | Gemcitabine+cisplatin                                                                      | Liver, peritoneum, LN, bone                            | Peritoneal           | SD                |
| 12    | 55/F      | None                    | IV                 | Poor                   | Gemcitabine+cisplatin, cisplatin                                                           | Lung, liver, LN                                        | Liver                | N.T.              |

AJCC, American Joint Committee on Cancer; SBRT, stereotactic body radiation therapy; HAI-floxuridine, hepatic arterial infusion with floxuridine; FOLFIRI, folinic acid (leucovorin), 5-fluorouracil and irinotecan; FOLFOX, folinic acid (leucovorin), 5-fluorouracil and oxaliplatin; TACE, trans-arterial chemoembolization; LN, lymph node; TIL, tumor infiltrating lymphocyte; ACT, adoptive cell therapy; PD, progressive disease; PR, partial response; N.T., not treated

Supplementary Table 2. Results of TIL screening for recognition of cancer-specific point mutations

| Pt ID | No of tumors sequenced | Mutations Identified (n) | Mutations screened (n) | Mutation (neoantigen) recognized by T cells | Neoantigen Variant Key    | HLA Class Restriction | Reference       |
|-------|------------------------|--------------------------|------------------------|---------------------------------------------|---------------------------|-----------------------|-----------------|
| 1     | 3                      | 162                      | 156                    | <i>RSU1</i> <sup>P150T</sup>                | 10:16794952-16794952 G>T  | II                    | Parkhurst, 2019 |
| 2     | 3                      | 219                      | 26                     | <i>ERBB2IP</i> <sup>E805G</sup>             | 5:65349560-65349560 A>G   | II                    | Tran, 2014      |
| 3     | 3                      | 59                       | 49                     | <i>TLK1</i> <sup>R170L</sup>                | 2:171906620-171906620 C>A | II                    |                 |
|       |                        |                          |                        | <i>MB21D2</i> <sup>M69I</sup>               | 3:192635423-192635423 C>A | II                    |                 |
|       |                        |                          |                        | <i>PAPLN</i> <sup>R75H</sup>                | 14:73712397-73712397 G>A  | II                    |                 |
|       |                        |                          |                        | <i>DDX41</i> <sup>K407E</sup>               | 5:176939332-176939332 T>C | II                    |                 |
| 4     | 1                      | 59                       | 35                     | <i>HIST1H2BE</i> <sup>E72V</sup>            | 6:26184238-26184238 A>T   | I                     | Parkhurst, 2019 |
| 5     | 1                      | 73                       | 64                     | None                                        |                           |                       |                 |
| 6     | 1                      | 27                       | 18                     | None                                        |                           |                       |                 |
| 7     | 3                      | 84                       | 56                     | <i>TUBGCP6</i> <sup>R611Q</sup>             | 22:50664480-50664480 C>T  | II                    | Parkhurst, 2019 |
|       |                        |                          |                        | <i>ECE2</i> <sup>A40T</sup>                 | 3:183994347-183994347 G>A | II                    |                 |
| 8     | Multiple               | 136                      | N.S.                   |                                             |                           |                       |                 |
| 9     | 2                      | 108                      | N.S.                   |                                             |                           |                       |                 |
| 10    | 2                      | 51                       | 35                     | None                                        |                           |                       |                 |
| 11    | 2                      | 230                      | 84                     | <i>TES</i> <sup>K62N</sup>                  | 7:115889146-115889146 A>T | I                     | Parkhurst, 2019 |
|       |                        |                          |                        | <i>HYDIN</i> <sup>G4555V</sup>              | 16:70867805-70867805 C>A  | II                    |                 |
|       |                        |                          |                        | <i>ACLY</i> <sup>R794W</sup>                | 17:40024980-40024980 T>A  | II                    |                 |
| 12    | 1                      | 994                      | 207                    | <i>NBAS</i> <sup>C144S</sup>                | 2:15679429-15679429 C>G   | I                     | Parkhurst, 2019 |
|       |                        |                          |                        | <i>EIF4A3</i> <sup>D169Y</sup>              | 17:78113807-78113807 C>A  | II                    |                 |

N.S., not screened

Supplementary Table 3. FGFR2 fusion sequences and genomic locations of the fusion partners

| Pt | Fusion             | 5' Partner    |                              | 3' Partner    |                              | Breakpoint-spanning amino acid sequence |
|----|--------------------|---------------|------------------------------|---------------|------------------------------|-----------------------------------------|
|    |                    | Transcript ID | Breakpoint coordinate (exon) | Transcript ID | Breakpoint coordinate (exon) |                                         |
| 1  | <i>FGFR2-TDRD1</i> | NM_000141.5   | 10:121483698 (17)            | NM_198795.2   | 10:114187826 (5' UTR*)       | EDLDRILTLTTNE ASMSVKSPFNVMS             |
| 2  | <i>FGFR2-CEP55</i> | NM_000141.5   | 10:121483698 (17)            | NM_018131.5   | 10:93500040 (5' UTR*)        | EDLDRILTLTTNE TISEMSSRSTKDL             |
| 3  | <i>FGFR2-WAC</i>   | NM_000141.5   | 10:121483698 (17)            | NM_016628.5   | 10:28617657 (12)             | EDLDRILTLTTNE ASRLREEAHNMGT             |
| 4  | <i>FGFR2-WAC</i>   | NM_000141.5   | 10:121483698 (17)            | NM_016628.5   | 10:28589736 (5)              | EDLDRILTLTTNE PYDSADDWSEHIS             |

\*5' untranslated region (UTR) of each gene is annotated as exon 1 in the RefSeq database.

Supplementary Table 4. Primer sequences used in this study

| Amplification product                              | Forward/reverse | Sequence (5'-3')               | Product size (bp) |
|----------------------------------------------------|-----------------|--------------------------------|-------------------|
| <i>GAPDH</i>                                       | forward         | ACC ACA GTC CAT GCC ATC AC     | 452               |
|                                                    | reverse         | TCC ACC ACC CTG TTG CTG TA     |                   |
| <i>FGFR2-WAC (Pt 4)</i>                            | forward         | ATT CCC GTG GAG GAA CTT TT     | 387               |
|                                                    | reverse         | TGT TGC TTG CAT CAC CTC TC     |                   |
| <i>FGFR2-WAC (Pt 3)</i>                            | forward         | ATT CCC GTG GAG GAA CTT TT     | 381               |
|                                                    | reverse         | CAC ACC ATG AAG GAA TTC TGA TT |                   |
| <i>FGFR2-CEP55</i>                                 | forward         | ATT CCC GTG GAG GAA CTT TT     | 399               |
|                                                    | reverse         | GCC TCA AGG ACT CGA ATT TT     |                   |
| <i>FGFR2-TDRD1</i>                                 | forward         | TCC TTC GGG GTG TTA ATG TG     | 466               |
|                                                    | reverse         | GGT TTG CTC ACA AAG CAA AAA    |                   |
| <i>African green monkey GAPDH (for COS7 cells)</i> | forward         | CAG CCT CAA GAT CGT CAG CA     | 134               |
|                                                    | reverse         | TCT TCT GGG TGG CAG TGA TG     |                   |



Supplementary Table 5. Sequences corresponding to FGFR2 fusion and control minigenes

| Patient | Fusion      | Amino Acid Sequence                                                                                                                                                                                                                                                                                                                      | Length |
|---------|-------------|------------------------------------------------------------------------------------------------------------------------------------------------------------------------------------------------------------------------------------------------------------------------------------------------------------------------------------------|--------|
| 1       | FGFR2-TDRD1 | <u>M</u> GLARDINNIDYYKTTNGRLPVKWMapeALFDRVYTHQSDVWSFGVLMWEIFTLGGSPY<br>PGIPVEELFKLLKEGHRMDKpanCTNELYMMMRDCWHAVPSQRPTFKQLVEDLDRILTLT<br>TNE ASMSVKSPFNVMsrnNLEAPPCKMTEPFNFekNENKLPPHESLRSPGTLPNHPNfRL<br>KSSengnKknnfLLCEQTKQYLASQEDNSVSSNPNGINGEVVGSkgDRKKLPAGNSVSP<br>PSAESNSPPKEVNIKPGNNVRPAKSKKLNKLVENSLsISNPGLFTSLGPPLRSTTCHRCGL     | 301    |
| 1       | FGFR2       | <u>M</u> LSDLVSEMEMMKMIGKHkNIINLLGACTQDGPLYVIVEYASKGNLREYLRARRPPGMEYS<br>YDINRVPEEQMTFKDLVScTYQLARGMEYLASQKCIHRDLAARNVLVTENNVMKIADFGLA<br>RDINNIDYYKTTNGRLPVKWMapeALFDRVYTHQSDVWSFGVLMWEIFTLGGSPYPGIPV<br>EELFKLLKEGHRMDKpanCTNELYMMMRDCWHAVPSQRPTFKQLVEDLDRILTLTNEEY<br>LDLSQPLEQYSPSPDTRSSCSGDDSVFSPDMPYEPCLPQYPHINGSVKT               | 295    |
| 1       | TDRD1       | <u>M</u> ASMSVKSPFNVMsrnNLEAPPCKMTEPFNFekNENKLPPHESLRSPGTLPNHPNfRLKS<br>SEngnKknnfLLCEQTKQYLASQEDNSVSSNPNGINGEVVGSkgDRKKLPAGNSVSPPS<br>AESNSPPKEVNIKPGNNVRPAKSKKLNKLVENSLsISNPGLFTSLGPPLRSTTCHRCGLFG<br>SLRCSQCKQTYCYCSTACQRDWSAHSIVCRPVQPNFHkLENKSSiETKDVEVNNKSDCPL<br>GVTKEIAIWAERIMFSDLRSLQLKKTMEIKGTVTEFKHPGDFYVQLYSSEVLEYMnQLSA     | 300    |
| 2       | FGFR2-CEP55 | <u>M</u> GLARDINNIDYYKTTNGRLPVKWMapeALFDRVYTHQSDVWSFGVLMWEIFTLGGSPY<br>PGIPVEELFKLLKEGHRMDKpanCTNELYMMMRDCWHAVPSQRPTFKQLVEDLDRILTLT<br>TNE TISEMSSRSTKDLIKSKWGSKPSNSKSETTLEKLKGEIAHLKTSVDEITSGKGLTDKE<br>RHRLLEKIRVLEAEKEKNAYQLTEKDKEIQRLRDQLKARYSTTTLLEQLEETTERGERREQV<br>LKALSEEKDVlKQQLSAATSRIAELESKTNTLRLSQTVApNCFNSSINNIHEMEIQL     | 302    |
| 3       | FGFR2-WAC   | <u>M</u> DLVSEMEMMKMIGKHkNIINLLGACTQDGPLYVIVEYASKGNLREYLRARRPPGMEYSYD<br>INRVPEEQMTFKDLVScTYQLARGMEYLASQKCIHRDLAARNVLVTENNVMKIADFGLaRD<br>INNIDYYKTTNGRLPVKWMapeALFDRVYTHQSDVWSFGVLMWEIFTLGGSPYPGIPVEE<br>LFKLLKEGHRMDKpanCTNELYMMMRDCWHAVPSQRPTFKQLVEDLDRILTLTNE ASRL<br>REEAHNMGTIHMSEICTELKNLrSLVRVCEIQATLREQRILFLRQIQIKELEKLKNQNSFMV | 305    |
| 4       | FGFR2-WAC   | <u>M</u> GLARDINNIDYYKTTNGRLPVKWMapeALFDRVYTHQSDVWSFGVLMWEIFTLGGSPY<br>PGIPVEELFKLLKEGHRMDKpanCTNELYMMMRDCWHAVPSQRPTFKQLVEDLDRILTLT<br>TNE PYDSADDWSEHISSSGKkYNYNCRTEVSQWEKPKEWLEREQRQKEANKMAVNSFP<br>KDRDYRREVMQATATSGFASGMEDKHSSDASSLLPQNILSQTsrHNDRDYRLPRAETHS<br>SSTPVQHPIKPVVHPTATPSTVPSSPFTLQSDHQPKSFDANGASTLSKLPTPTSSVP           | 296    |

“M” delineates addition of a methionine (i.e., start codon after translation) to allow transcription and translation of the entire minigene sequence; “|” delineates the fusion breakpoint

Supplementary Table 6. Sequence of the FGFR2 fusion-reactive TCR from patient 1

| <b>TCR chain</b> | <b>V region</b> | <b>J region</b> | <b>CDR3b amino acid sequence</b> |
|------------------|-----------------|-----------------|----------------------------------|
| TCRA             | TRAV9-2         | TRAJ9           | CALSDRNTGGFKTIF                  |
| TCRB             | TRBV5-1         | TRBJ2-7         | CASSLPNSSFFTQEYF                 |
