# Supplementary figures and images for: Specific recognition of an FGFR2 fusion by tumor infiltrating lymphocytes from a patient with metastatic cholangiocarcinoma
Source: PubMed Central journal article supplement — J Immunother Cancer. 2023 Apr 12;11(4):e006303. doi: 10.1136/jitc-2022-006303 (PMC10106037; doi:10.1136/jitc-2022-006303), 2023-04-12

## Supplementary Figure 1

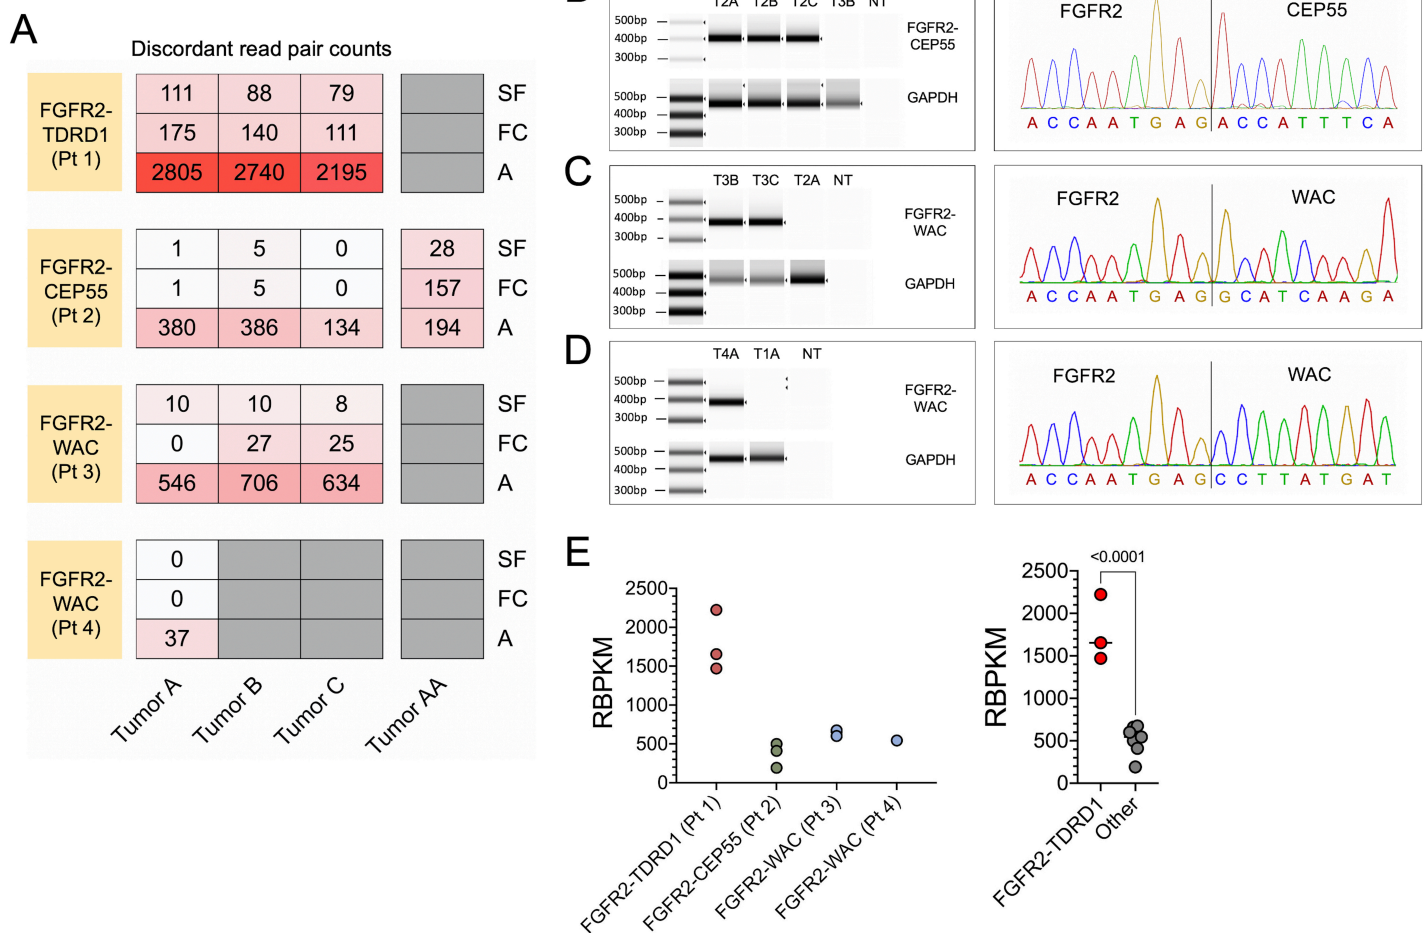

Supplement: jitc-2022-006303supp001.pdf [file jitc-2022-006303supp001.pdf]

## Supplementary Figure 2

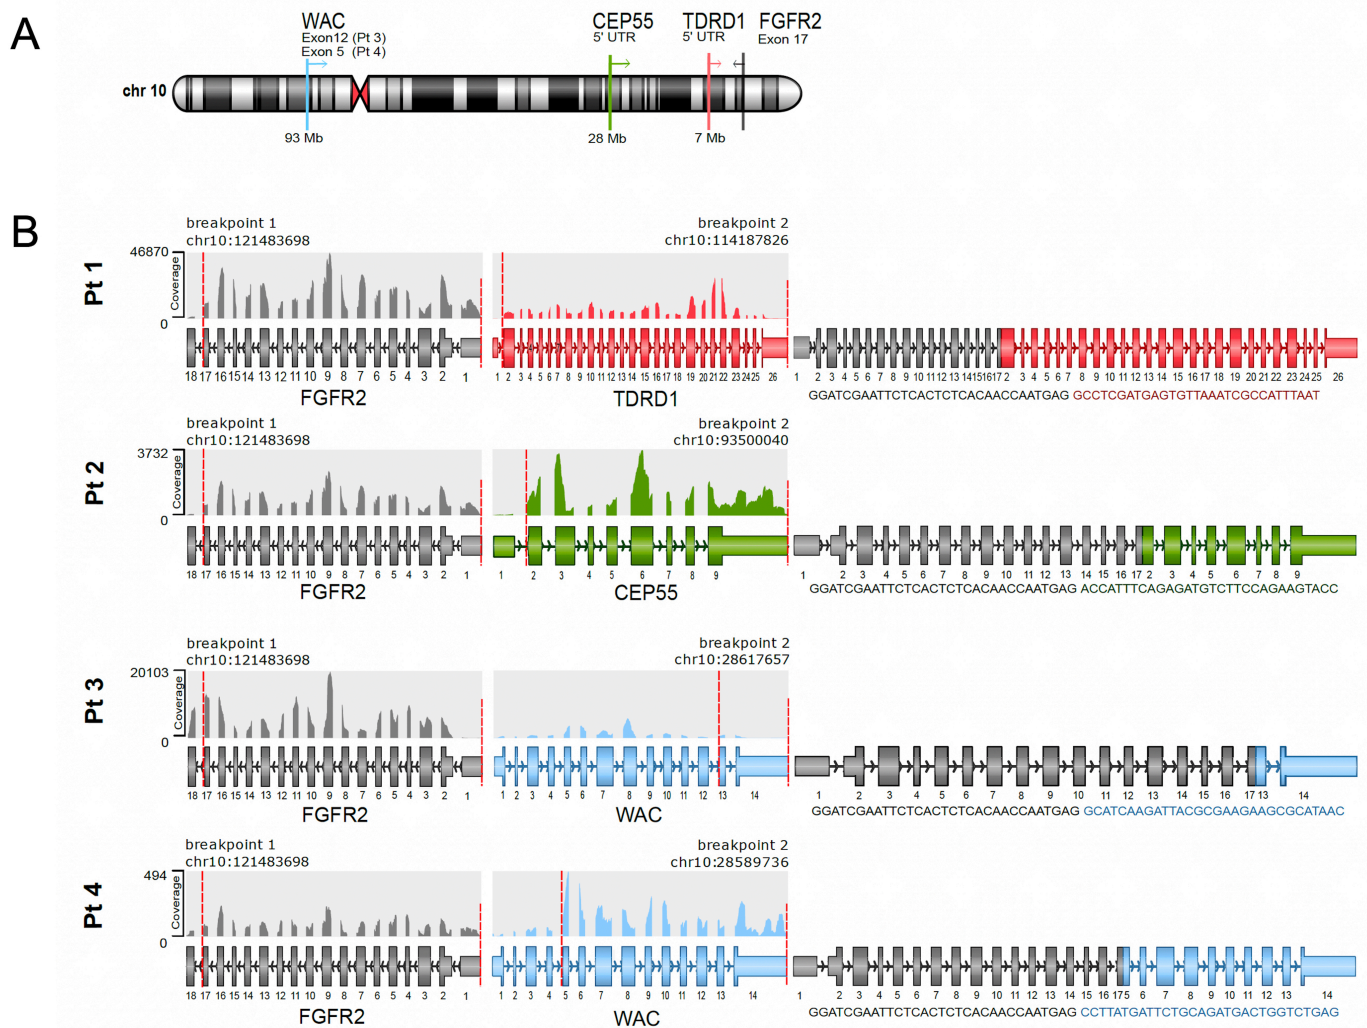

Supplement: jitc-2022-006303supp002.pdf [file jitc-2022-006303supp002.pdf]

## Supplementary Figure 3

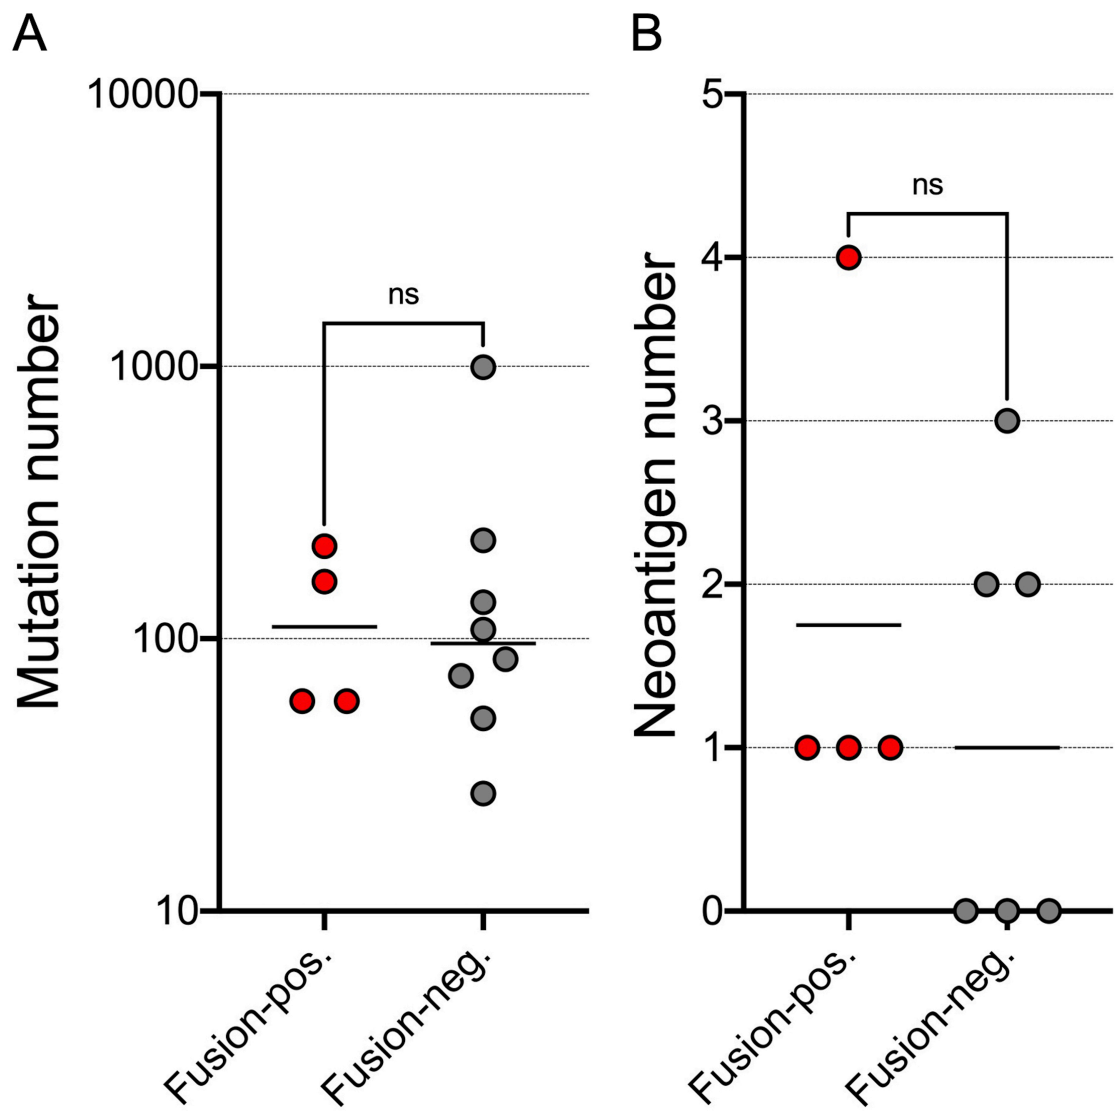

Supplement: jitc-2022-006303supp003.pdf [file jitc-2022-006303supp003.pdf]

### Supplementary Figure 4

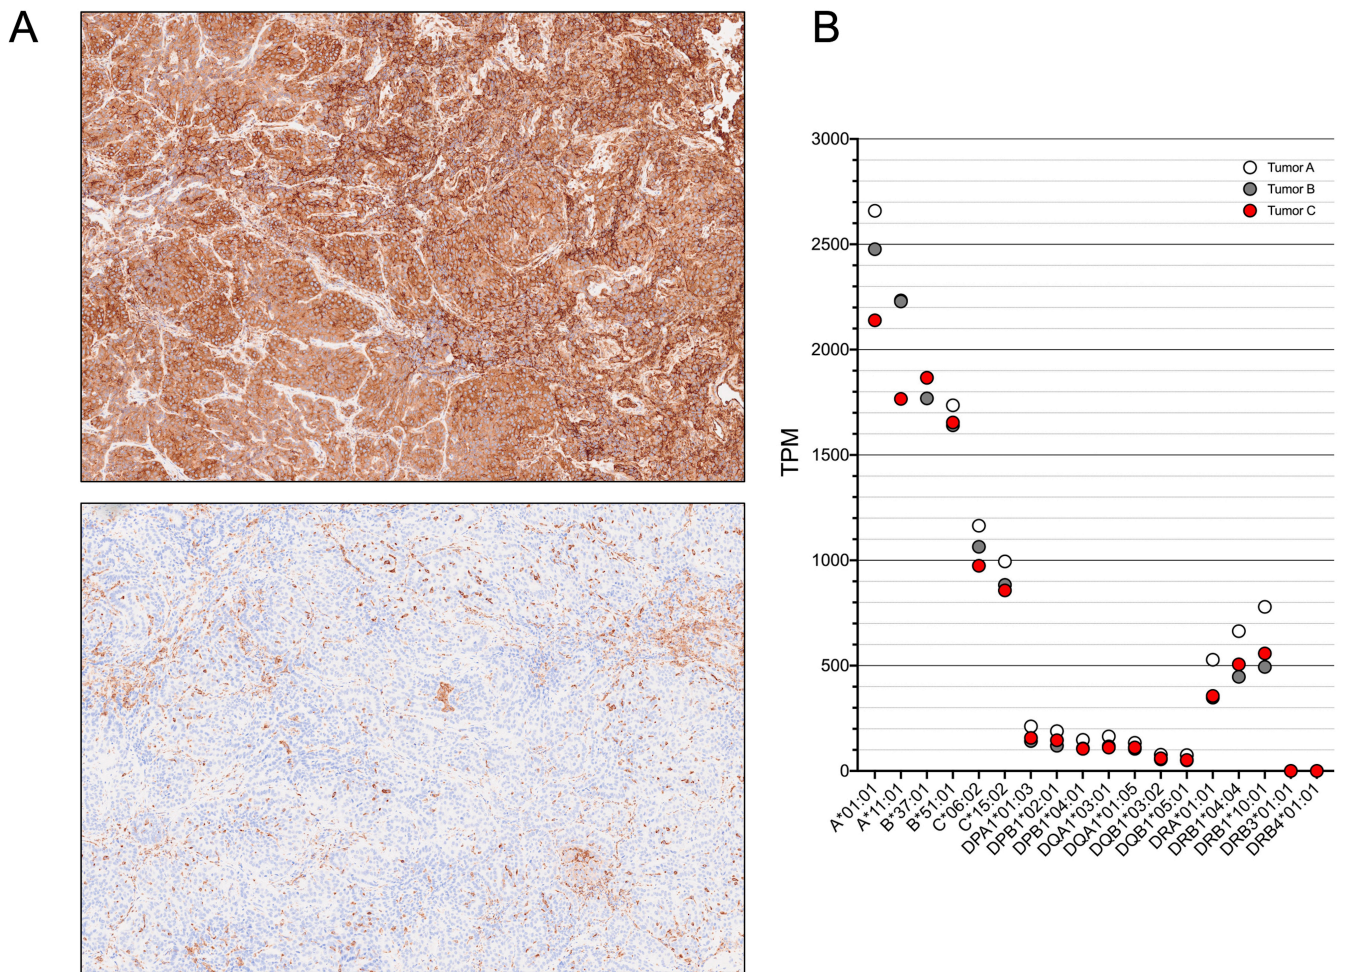

Supplement: jitc-2022-006303supp004.pdf [file jitc-2022-006303supp004.pdf]

## Supplementary Figure 5

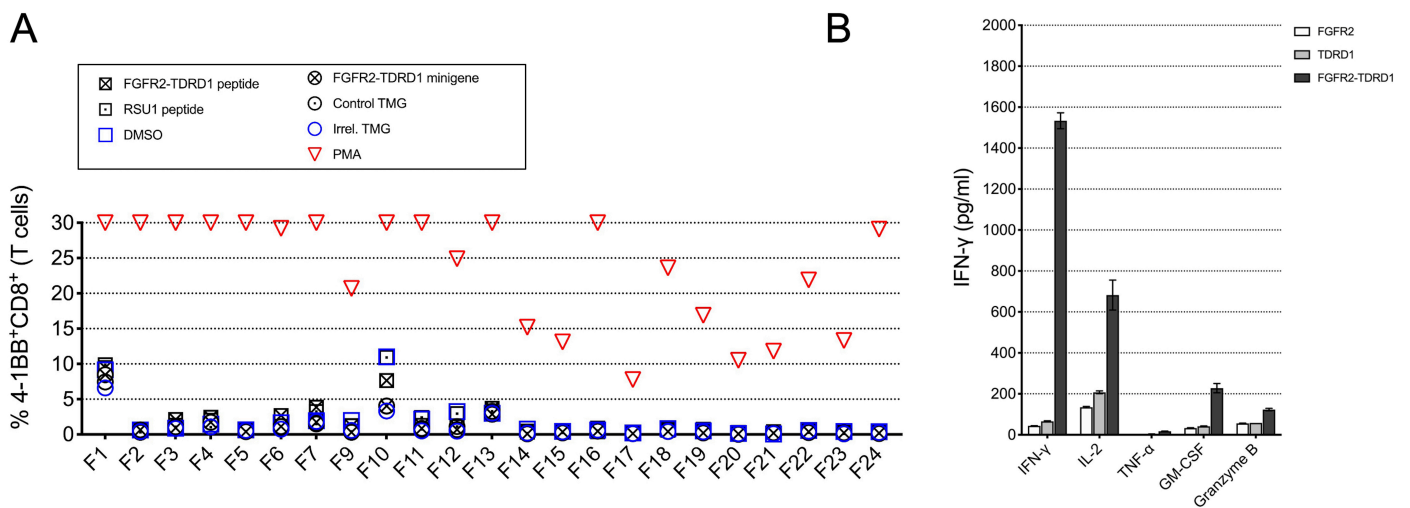

Supplement: jitc-2022-006303supp005.pdf [file jitc-2022-006303supp005.pdf]

### Supplementary Figure 6

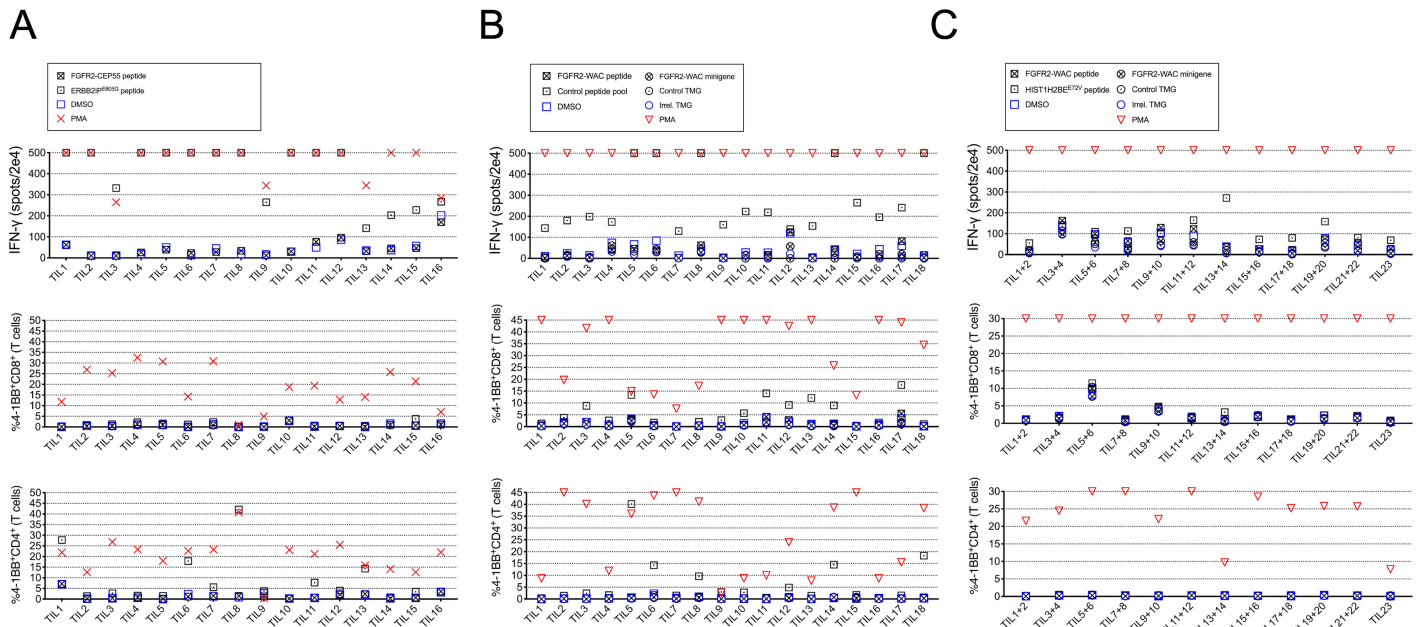

Supplement: jitc-2022-006303supp006.pdf [file jitc-2022-006303supp006.pdf]

## Supplementary Figure 7

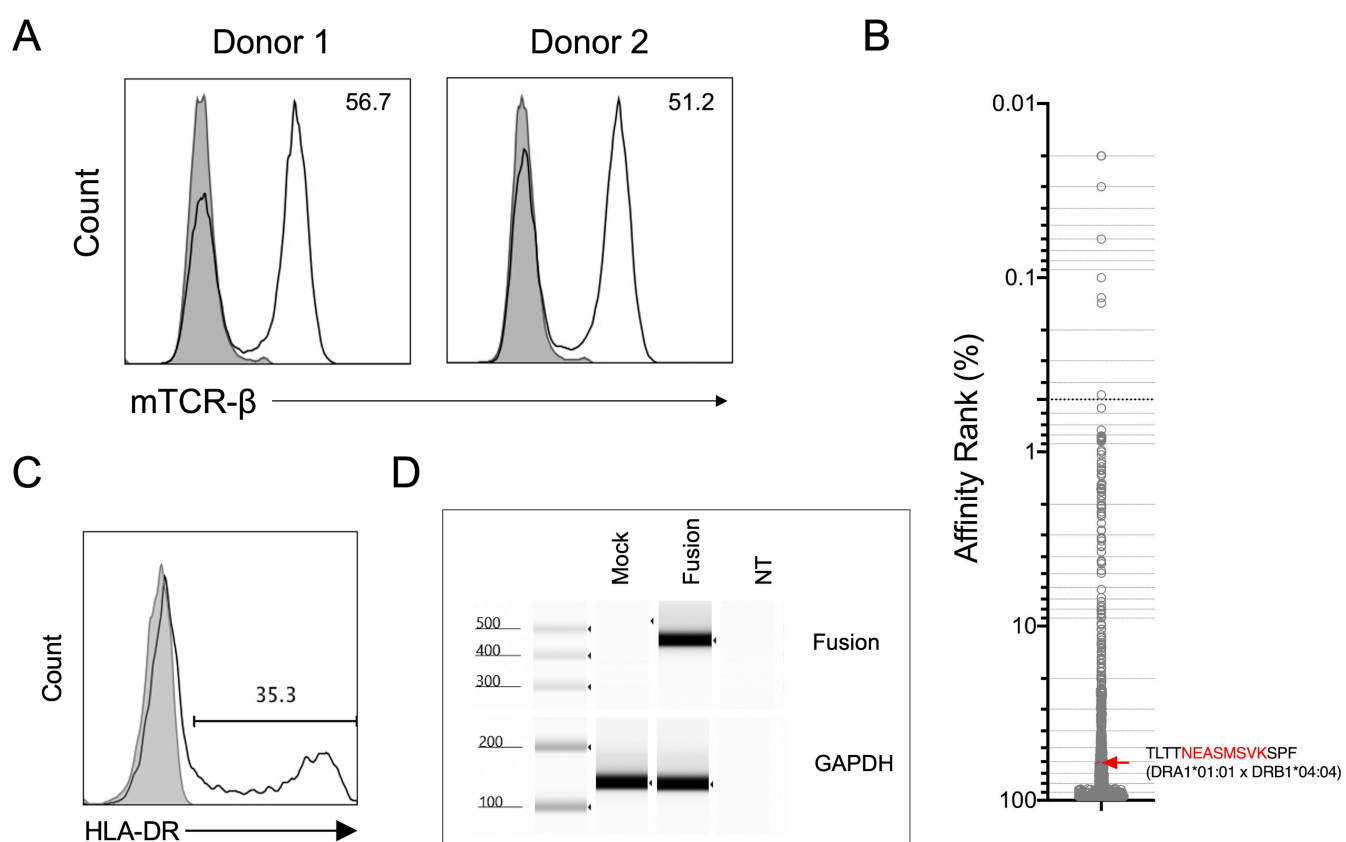

Supplement: jitc-2022-006303supp007.pdf [file jitc-2022-006303supp007.pdf]
